# Supplementary material for: The Inverted U-Shaped Association between Serum Vitamin D and Serum Uric Acid Status in Children and Adolescents: A Large Cross-Sectional and Longitudinal Analysis
Source: MDPI journal article supplement (doi:10.3390/nu16101492), 2024-05-15
Supplement: s1 [file s1]

**The inverted U-shaped association between serum vitamin D and serum uric acid status in children and adolescents: a large cross-sectional and longitudinal analysis**

**Supplementary online content**

**Figure S1.** Flow chart of study design with participant enrollment.

**Table S1.** The follow-up characteristics of 1641 participants by quartiles of serum 25(OH)D.

**Table S2.** Stratified analyses of potential modification effect for the association between serum 25(OH)D and SUA.

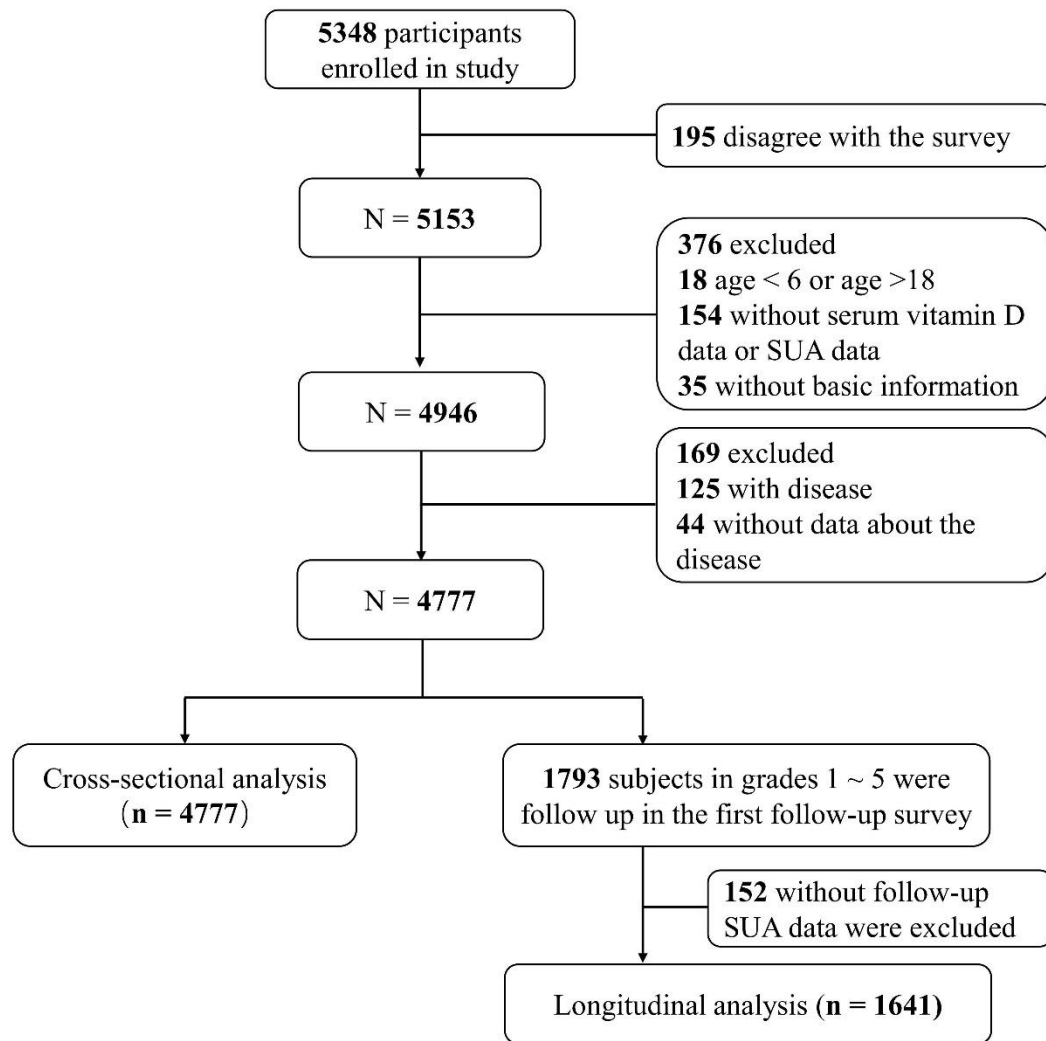

**Figure S1. Flow chart of study design with participant enrollment**

Table S1. The follow-up characteristics of 1641 participants by quartiles of serum 25(OH)D.

|                                        | Total                | Q1                   | Q2                   | Q3                   | Q4                   | P-value |
|----------------------------------------|----------------------|----------------------|----------------------|----------------------|----------------------|---------|
| N                                      | 1641                 | 411                  | 412                  | 408                  | 410                  |         |
| Age, years                             | 10.33[9.04,11.53]    | 10.83[9.27,11.92]    | 10.60[9.27,11.64]    | 10.21[8.91,11.24]    | 9.85[8.76,11.07]     | <0.001  |
| Female, n (%)                          | 738(45.0)            | 181(44.0)            | 232(56.3)            | 240(58.8)            | 250(61.0)            | <0.001  |
| Waist, cm                              | 55.00 [51.00, 61.00] | 55.00 [51.30, 61.00] | 55.00 [51.00, 62.52] | 54.50 [51.00, 60.00] | 54.50 [50.50, 59.25] | 0.126   |
| BMI, kg/m2                             | 15.82[14.50, 17.71]  | 15.87 [14.62, 18.06] | 15.91 [14.52, 17.97] | 15.75 [14.50, 17.50] | 15.75 [14.40, 17.48] | 0.268   |
| Weight status, n (%)                   |                      |                      |                      |                      |                      | 0.684   |
| Underweight                            | 194(11.8)            | 48(11.7)             | 51(12.4)             | 43(10.5)             | 52(12.7)             |         |
| Normal                                 | 1106(67.4)           | 285(69.3)            | 276(67.0)            | 274(67.2)            | 271(66.1)            |         |
| Overweight                             | 181(11.0)            | 35(8.5)              | 45(10.9)             | 48(11.8)             | 53(12.9)             |         |
| Obesity                                | 160(9.8)             | 43(10.5)             | 40(9.7)              | 43(10.5)             | 34(8.3)              |         |
| Puberty stage, n (%)                   |                      |                      |                      |                      |                      | <0.001  |
| Pre-puberty                            | 1166(71.1)           | 251(61.1)            | 278(67.5)            | 307(75.2)            | 330(80.5)            |         |
| Mid-puberty                            | 416(25.4)            | 126(30.7)            | 122(29.6)            | 97(23.8)             | 71(17.3)             |         |
| Post-puberty                           | 59(3.6)              | 34(8.3)              | 12(2.9)              | 4(1.0)               | 9(2.2)               |         |
| Household income, n (%)                |                      |                      |                      |                      |                      | 0.003   |
| < 120 000 CNY per year                 | 394(24.0)            | 122(29.7)            | 102(24.8)            | 91(22.3)             | 79(19.3)             |         |
| ~250 000 CNY per year                  | 538(32.8)            | 145(35.3)            | 133(32.3)            | 122(29.9)            | 138(33.7)            |         |
| ≥250 000 CNY per year                  | 696(42.4)            | 141(34.3)            | 175(42.5)            | 189(46.3)            | 191(46.6)            |         |
| Missing                                | 13(0.8)              | 3(0.7)               | 2(0.5)               | 6(1.5)               | 2(0.5)               |         |
| Paternal education level, n (%)        |                      |                      |                      |                      |                      | 0.002   |
| ≤ 9years                               | 170(10.4)            | 53(12.9)             | 43(10.4)             | 39(9.6)              | 35(8.5)              |         |
| ~12years                               | 347(21.1)            | 112(27.3)            | 88(21.4)             | 78(19.1)             | 69(16.8)             |         |
| ~15years                               | 462(28.2)            | 119(29.0)            | 102(24.8)            | 120(29.4)            | 121(29.5)            |         |
| ≥ 16years                              | 654(39.9)            | 125(30.4)            | 177(43.0)            | 169(41.4)            | 183(44.6)            |         |
| Missing                                | 8(0.5)               | 2(0.5)               | 2(0.5)               | 2(0.5)               | 2(0.5)               |         |
| Maternal education level, n (%)        |                      |                      |                      |                      |                      | 0.002   |
| ≤ 9years                               | 233(14.2)            | 65(15.8)             | 65(15.8)             | 54(13.2)             | 49(12.0)             |         |
| ~12years                               | 365(22.2)            | 122(29.7)            | 82(19.9)             | 82(20.1)             | 79(19.3)             |         |
| ~15years                               | 477(29.1)            | 96(23.4)             | 111(26.9)            | 138(33.8)            | 132(32.2)            |         |
| ≥ 16years                              | 552(33.6)            | 125(30.4)            | 151(36.7)            | 131(32.1)            | 145(35.4)            |         |
| Missing                                | 14(0.9)              | 3(0.7)               | 3(0.7)               | 3(0.7)               | 5(1.2)               |         |
| Vitamin D supplement, n (%)            |                      |                      |                      |                      |                      | <0.001  |
| No                                     | 1373(83.7)           | 369(89.8)            | 337(81.8)            | 341(83.6)            | 326(79.5)            |         |
| Yes                                    | 265(16.1)            | 42(10.2)             | 72(17.5)             | 67(16.4)             | 84(20.5)             |         |
| Missing                                | 3(0.2)               | 0(0.0)               | 3(0.7)               | 0(0.0)               | 0(0.0)               |         |
| Multivitamin mineral supplement, n (%) |                      |                      |                      |                      |                      | 0.391   |
| No                                     | 1497(91.2)           | 370(90.0)            | 374(90.8)            | 384(94.1)            | 369(90.0)            |         |
| Yes                                    | 134(8.2)             | 39(9.5)              | 35(8.5)              | 22(5.4)              | 38(9.3)              |         |
| Missing                                | 10(0.6)              | 2(0.5)               | 3(0.7)               | 2(0.5)               | 3(0.7)               |         |
| Smoking status, n (%)                  |                      |                      |                      |                      |                      | 0.651   |
| Never                                  | 1609(98.0)           | 402(97.8)            | 404(98.1)            | 404(99.0)            | 399(97.3)            |         |
| < 1cigarette per month                 | 8(0.5)               | 3(0.7)               | 2(0.5)               | 1(0.2)               | 2(0.5)               |         |
| ≥ 1cigarette per month                 | 2(0.1)               | 0(0.0)               | 0(0.0)               | 1(0.2)               | 1(0.2)               |         |
| e-Cigarette                            | 1(0.1)               | 0(0.0)               | 1(0.2)               | 0(0.0)               | 0(0.0)               |         |
| Missing                                | 21(1.3)              | 6(1.5)               | 5(1.2)               | 2(0.5)               | 8(2.0)               |         |
| Drinking status, n (%)                 |                      |                      |                      |                      |                      | 0.429   |
| Never                                  | 1588(96.8)           | 396(96.4)            | 396(96.1)            | 401(98.3)            | 395(96.3)            |         |
| < 1standard drink per month            | 43(2.6)              | 13(3.2)              | 11(2.7)              | 6(1.5)               | 13(3.2)              |         |
| ≥ 1standard drink per month            | 2(0.1)               | 0(0.0)               | 1(0.2)               | 1(0.2)               | 0(0.0)               |         |
| Missing                                | 8(0.5)               | 2(0.5)               | 4(1.0)               | 0(0.0)               | 2(0.5)               |         |
| Levels of MVPA, n (%)                  |                      |                      |                      |                      |                      | 0.315   |
| < 0.5hourperd                          | 478(29.1)            | 123(29.9)            | 112(27.2)            | 122(29.9)            | 121(29.5)            |         |
| ~1hourperd                             | 725(44.2)            | 171(41.6)            | 189(45.9)            | 177(43.4)            | 188(45.9)            |         |
| ~3hoursperd                            | 374(22.8)            | 98(23.8)             | 91(22.1)             | 90(22.1)             | 95(23.2)             |         |
| > 3hoursperd                           | 49(3.0)              | 17(4.1)              | 15(3.6)              | 13(3.2)              | 4(1.0)               |         |
| Missing                                | 15(0.9)              | 2(0.5)               | 5(1.2)               | 6(1.5)               | 2(0.5)               |         |
| SUA-annual variation, μmol/(L*year)    | 24.40 [20.35, 28.65] | 25.01[-4.61, 51.37]  | 19.85[-5.62, 48.58]  | 15.15[-10.56, 43.05] | 17.08[-7.70, 44.14]  | 0.047   |
| 25(OH)D, ng/mL                         | 0.39 [0.26, 0.57]    | 18.12[16.18, 19.34]  | 22.42[21.41, 23.45]  | 26.17[25.28, 27.35]  | 31.77[29.89, 34.48]  | <0.001  |
| 25(OH)D <sub>2</sub> , ng/mL           | 23.80 [19.79, 28.14] | 0.36[0.24,0.53]      | 0.39[0.26,0.59]      | 0.42[0.28,0.64]      | 0.40[0.28,0.57]      | <0.001  |
| 25(OH)D <sub>3</sub> , ng/mL           | 15.17 [13.75, 16.04] | 17.69[15.68, 18.86]  | 21.91[20.94, 22.92]  | 25.66[24.67, 26.75]  | 31.34[29.46, 33.84]  | <0.001  |

Abbreviations: BMI, body mass index; CNY, Chinese Yuan; MVPA, moderate to vigorous physical activity; SUA, serum uric acid.

**Table S2. Stratified analyses of potential modification effect for the association between serum 25(OH)D and SUA.**

|                         |      | Concentrations < 24.31 ng/mL          |                   |      | Concentrations ≥ 24.31 ng/mL          |                   |
|-------------------------|------|---------------------------------------|-------------------|------|---------------------------------------|-------------------|
|                         | N    | Adjusted $\beta$ coefficient (95% CI) | P for interaction | N    | Adjusted $\beta$ coefficient (95% CI) | P for interaction |
| <b>Sex</b>              |      |                                       | < 0.0001          |      |                                       | 0.0901            |
| Male                    | 1617 | 5.97(-5.82, 17.77)                    |                   | 1035 | -6.63(-17.73, 4.48)                   |                   |
| Female                  | 1542 | 6.43(-2.77, 15.64)                    |                   | 583  | 1.26(-13.20, 15.73)                   |                   |
| <b>Age</b>              |      |                                       | 0.0008            |      |                                       | 0.1491            |
| 6-12                    | 1565 | -4.09(-14.86, 6.69)                   |                   | 1273 | -9.12(-18.38, 0.13)                   |                   |
| 12-18                   | 1594 | 5.62(-4.74, 15.98)                    |                   | 345  | 17.24(-8.43, 42.91)                   |                   |
| <b>Stage of puberty</b> |      |                                       | 0.0332            |      |                                       | 0.4826            |
| Pre-puberty             | 662  | 3.13(-12.64, 18.90)                   |                   | 832  | -1.01(-10.81, 8.78)                   |                   |
| Mid-puberty             | 663  | 8.15(-10.23, 26.52)                   |                   | 397  | -15.21(-36.57, 6.16)                  |                   |
| Post-puberty            | 1834 | 7.58(-1.88, 17.03)                    |                   | 389  | 10.09(-12.97, 33.15)                  |                   |
| <b>Weight status</b>    |      |                                       | 0.8208            |      |                                       | 0.1970            |
| Underweight             | 250  | -0.69(-28.82, 27.44)                  |                   | 170  | -3.61(-28.82, 27.44)                  |                   |
| Normal                  | 2198 | 6.66(-2.20, 15.53)                    |                   | 1072 | -4.19(-14.85, 6.47)                   |                   |
| Overweight              | 711  | 8.11(-10.47, 26.70)                   |                   | 376  | -11.73(-34.21, 10.75)                 |                   |
| <b>Central obesity</b>  |      |                                       | 0.3447            |      |                                       | 0.3852            |
| Yes                     | 433  | 6.30(-16.68, 29.28)                   |                   | 193  | -29.11(-65.86, 7.65)                  |                   |
| No                      | 2613 | 10.21(1.96, 18.46)                    |                   | 1254 | -3.72(-13.72, 6.28)                   |                   |

Generalized linear models were used. Model adjusted for age, gender, weight status, pubertal development stages, household income, parental education levels, maternal education levels, smoking and drinking status, vitamin D supplement, multivitamin mineral supplement, levels of MVPA. *P* value for interaction was obtained by using the Wald test.

SUA corresponds to units of  $\mu\text{mol/L}$ .
